# Supplementary material for: SGLT-2 receptor inhibitors for treating patients with type 2 diabetes mellitus: a systematic review and network meta-analysis
Source: PubMed Central journal article supplement — BMJ Open. 2016 Feb 24;6(2):e009417. doi: 10.1136/bmjopen-2015-009417 (PMC4769433; doi:10.1136/bmjopen-2015-009417), 2016-02-24
Supplement: bmjopen-2015-009417supp_appendix.pdf [file bmjopen-2015-009417supp_appendix.pdf]

## **APPENDIX 1**

### **Ovid MEDLINE [Searched on 1<sup>st</sup> June 2014]**

1. randomized controlled trial
2. (random\* or blind\* or placebo or trial).tw
3. systematic review.tw
4. meta-analysis.pt
5. 1 or 2 or 3 or 4
6. exp Diabetes Mellitus, Type 2/
7. type 2 diabetes mellitus.tw
8. T2DM.tw
9. 6 or 7 or 8
10. (dapagliflozin or empagliflozin or canagliflozin or luseogliflozin or ipragliflozin or tofogliflozin).tw
11. (SGLT 2 inhibitors).tw
12. (sodium-glucose-co-transporter or sodium glucose co transporter or sodium-glucose co-transporter).tw
13. 10 or 11 or 12
14. 5 and 9 and 13
15. Limit 14 to (English language and humans and yr=2005 –Current")
